# Supplementary material for: Ergot and Ergot Alkaloids in Cereal Grains Intended for Animal Feeding Collected in Slovenia: Occurrence, Pattern and Correlations
Source: PubMed Central journal article supplement (PMC7700445; doi:10.3390/toxins12110730), 2020-11-21
Supplement: toxins-12-00730-s001.pdf [file toxins-12-00730-s001.pdf]

# Supplementary Materials: Ergot and Ergot Alkaloids Intended for Animal Feeding Collected in Slovenia: Occurrence, Pattern And Correlations

Janja Babič, Gabrijela Tavčar-Kalcher, Franci Aco Celar, Katarina Kos, Matjaž Črvek and Breda Jakovac-Strajn

Table S1. Analytical correlations in positive samples.

| Spearman's rho                                | Total EAs | Em      | Emn     | Es      | Esn     | Eco     | Econ    | Ekr     | Ekrn    | Et      | Etn     | Ecr     | Ecrn    |         |
|-----------------------------------------------|-----------|---------|---------|---------|---------|---------|---------|---------|---------|---------|---------|---------|---------|---------|
| <b>M<sub>scl</sub> (mg)</b>                   | r         | 0.284** | 0.228*  | 0.401** | 0.178   | 0.324** | 0.335** | 0.325** | 0.214*  | 0.279** | 0.252'  | 0.251'  | 0.193   | 0.326** |
|                                               | p         | 0.008   | 0.034   | <0.001  | 0.099   | 0.002   | 0.002   | 0.002   | 0.047   | 0.009   | 0.019   | 0.019   | 0.073   | 0.002   |
|                                               | N         | 87      | 87      | 87      | 87      | 87      | 87      | 87      | 87      | 87      | 87      | 87      | 87      | 87      |
| <b>M<sub>scl</sub>/M<sub>cer</sub> (g/kg)</b> | r         | 0.315** | 0.235*  | 0.391** | 0.194   | 0.315** | 0.356** | 0.325** | 0.235*  | 0.313** | 0.276** | 0.271'  | 0.230'  | 0.329** |
|                                               | p         | 0.003   | 0.028   | <0.001  | 0.072   | 0.003   | 0.001   | 0.002   | 0.029   | 0.003   | 0.010   | 0.011   | 0.032   | 0.002   |
|                                               | N         | 87      | 87      | 87      | 87      | 87      | 87      | 87      | 87      | 87      | 87      | 87      | 87      | 87      |
| <b>Total EAs (µg/kg)</b>                      | r         | 1.000   | 0.558** | 0.583** | 0.810** | 0.734** | 0.639** | 0.452** | 0.630** | 0.626** | 0.698** | 0.686** | 0.686** | 0.704** |
|                                               | p         | <0.001  | <0.001  | <0.001  | <0.001  | <0.001  | <0.001  | <0.001  | <0.001  | <0.001  | <0.001  | <0.001  | <0.001  | <0.001  |
|                                               | N         | 87      | 87      | 87      | 87      | 87      | 87      | 87      | 87      | 87      | 87      | 87      | 87      | 87      |
| <b>Em</b>                                     | r         | 0.558** | 1.000   | 0.648** | 0.500** | 0.237*  | 0.463** | 0.325** | 0.279** | 0.252'  | 0.469** | 0.441** | 0.456** | 0.435** |
|                                               | p         | <0.001  |         | <0.001  | <0.001  | 0.027   | <0.001  | 0.002   | 0.009   | 0.019   | <0.001  | <0.001  | <0.001  | <0.001  |
|                                               | N         | 87      | 87      | 87      | 87      | 87      | 87      | 87      | 87      | 87      | 87      | 87      | 87      | 87      |
| <b>Emn</b>                                    | r         | 0.583** | 0.648** | 1.000   | 0.533** | 0.394** | 0.499** | 0.491** | 0.324** | 0.348** | 0.526** | 0.586** | 0.445** | 0.602** |
|                                               | p         | <0.001  | <0.001  |         | <0.001  | <0.001  | <0.001  | <0.001  | 0.002   | 0.001   | <0.001  | <0.001  | <0.001  | <0.001  |
|                                               | N         | 87      | 87      | 87      | 87      | 87      | 87      | 87      | 87      | 87      | 87      | 87      | 87      | 87      |
| <b>Es</b>                                     | r         | 0.810** | 0.500** | 0.533** | 1.000   | 0.734** | 0.621** | 0.360** | 0.504** | 0.414** | 0.638** | 0.581** | 0.689** | 0.578** |
|                                               | p         | <0.001  | <0.001  | <0.001  |         | <0.001  | <0.001  | 0.001   | <0.001  | <0.001  | <0.001  | <0.001  | <0.001  | <0.001  |
|                                               | N         | 87      | 87      | 87      | 87      | 87      | 87      | 87      | 87      | 87      | 87      | 87      | 87      | 87      |
| <b>Esn</b>                                    | r         | 0.734** | 0.237*  | 0.394** | 0.734** | 1.000   | 0.486** | 0.371** | 0.403** | 0.405** | 0.465** | 0.473** | 0.440** | 0.557** |
|                                               | p         | <0.001  | 0.027   | <0.001  | <0.001  |         | <0.001  | <0.001  | <0.001  | <0.001  | <0.001  | <0.001  | <0.001  | <0.001  |
|                                               | N         | 87      | 87      | 87      | 87      | 87      | 87      | 87      | 87      | 87      | 87      | 87      | 87      | 87      |
| <b>Eco</b>                                    | r         | 0.639** | 0.463** | 0.499** | 0.621** | 0.486** | 1.000   | 0.740** | 0.707** | 0.595** | 0.521** | 0.526** | 0.475** | 0.361** |
|                                               | p         | <0.001  | <0.001  | <0.001  | <0.001  | <0.001  |         | <0.001  | <0.001  | <0.001  | <0.001  | <0.001  | <0.001  | <0.001  |
|                                               | N         | 87      | 87      | 87      | 87      | 87      | 87      | 87      | 87      | 87      | 87      | 87      | 87      | 87      |
| <b>Econ</b>                                   | r         | 0.452** | 0.325** | 0.491** | 0.360** | 0.371** | 0.740** | 1.000   | 0.607** | 0.624** | 0.285** | 0.387** | 0.184   | 0.227*  |
|                                               | p         | <0.001  | 0.002   | <0.001  | 0.001   | <0.001  | <0.001  |         | <0.001  | <0.001  | 0.007   | <0.001  | 0.089   | 0.035   |
|                                               | N         | 87      | 87      | 87      | 87      | 87      | 87      | 87      | 87      | 87      | 87      | 87      | 87      | 87      |
| <b>Ekr</b>                                    | r         | 0.630** | 0.279** | 0.324** | 0.504** | 0.403** | 0.707** | 0.607** | 1.000   | 0.883** | 0.394** | 0.420** | 0.372** | 0.264*  |
|                                               | p         | <0.001  | 0.009   | 0.002   | <0.001  | <0.001  | <0.001  | <0.001  |         | <0.001  | <0.001  | <0.001  | <0.001  | 0.014   |
|                                               | N         | 87      | 87      | 87      | 87      | 87      | 87      | 87      | 87      | 87      | 87      | 87      | 87      | 87      |
| <b>Ekrn</b>                                   | r         | 0.626** | 0.252'  | 0.348** | 0.414** | 0.405** | 0.595** | 0.624** | 0.883** | 1.000   | 0.289** | 0.353** | 0.284** | 0.309** |
|                                               | p         | <0.001  | 0.019   | 0.001   | <0.001  | <0.001  | <0.001  | <0.001  | <0.001  |         | 0.007   | 0.001   | 0.008   | 0.004   |
|                                               | N         | 87      | 87      | 87      | 87      | 87      | 87      | 87      | 87      | 87      | 87      | 87      | 87      | 87      |
| <b>Et</b>                                     | r         | 0.698** | 0.469** | 0.526** | 0.638** | 0.465** | 0.521** | 0.285** | 0.394** | 0.289** | 1.000   | 0.898** | 0.683** | 0.604** |
|                                               | p         | <0.001  | <0.001  | <0.001  | <0.001  | <0.001  | <0.001  | 0.007   | <0.001  | 0.007   |         | <0.001  | <0.001  | <0.001  |
|                                               | N         | 87      | 87      | 87      | 87      | 87      | 87      | 87      | 87      | 87      | 87      | 87      | 87      | 87      |
| <b>Etn</b>                                    | r         | 0.686** | 0.441** | 0.586** | 0.581** | 0.473** | 0.526** | 0.387** | 0.420** | 0.353** | 0.898** | 1.000   | 0.589** | 0.618** |
|                                               | p         | <0.001  | <0.001  | <0.001  | <0.001  | <0.001  | <0.001  | <0.001  | <0.001  | 0.001   | <0.001  |         | <0.001  | <0.001  |
|                                               | N         | 87      | 87      | 87      | 87      | 87      | 87      | 87      | 87      | 87      | 87      | 87      | 87      | 87      |
| <b>Ecr</b>                                    | r         | 0.686** | 0.456** | 0.445** | 0.689** | 0.440** | 0.475** | 0.184   | 0.372** | 0.284** | 0.683** | 0.589** | 1.000   | 0.750** |
|                                               | p         | <0.001  | <0.001  | <0.001  | <0.001  | <0.001  | <0.001  | 0.089   | <0.001  | 0.008   | <0.001  | <0.001  |         | <0.001  |
|                                               | N         | 87      | 87      | 87      | 87      | 87      | 87      | 87      | 87      | 87      | 87      | 87      | 87      | 87      |
| <b>Ecrn</b>                                   | r         | 0.704** | 0.435** | 0.602** | 0.578** | 0.557** | 0.361** | 0.227*  | 0.264*  | 0.309** | 0.604** | 0.618** | 0.750** | 1.000   |
|                                               | p         | <0.001  | <0.001  | <0.001  | <0.001  | <0.001  | 0.001   | 0.035   | 0.014   | 0.004   | <0.001  | <0.001  | <0.001  |         |
|                                               | N         | 87      | 87      | 87      | 87      | 87      | 87      | 87      | 87      | 87      | 87      | 87      | 87      | 87      |

Legend: M—mass, scl—sclerotia, cer—cereals, r—correlation coefficient, p—statistical significance, Sig. (two-tailed). \*\*. Correlation is significant at the 0.01 level (two-tailed); \*. Correlation is significant at the 0.05 level (two-tailed). Strength of the positive and negative correlation was evaluated using the Evans (1996) guidelines [1]: a) very weak: 0.00–0.19' b) weak: 0.20–0.39; c) moderate: 0.40–0.59; d) strong: 0.60–0.79; e) very strong: 0.80–1.0.

**Table S2.** Guidelines for interpreting the strength of the correlation (Evans, 1996) [1].

| Correlation Coefficient Value    | Strength                    |
|----------------------------------|-----------------------------|
| Between $\pm 0.8$ and $\pm 1.0$  | Very strong correlation     |
| Between $\pm 0.6$ and $\pm 0.79$ | Strong correlation          |
| Between $\pm 0.4$ and $\pm 0.59$ | Moderate correlation        |
| Between $\pm 0.2$ and $\pm 0.39$ | Weak correlation            |
| Between $\pm 0.1$ and $\pm 0.19$ | Very weak or no correlation |

**Table S3.** Performance characteristics of the analytical procedure for the determination of ergot alkaloids [2].

|                | Recovery (%) | RSDr (%) | RSDR (%) |
|----------------|--------------|----------|----------|
| Ergometrine    | 124          | 16       | 19       |
| Ergometrinine  | 119          | 16       | 28       |
| Ergosine       | 122          | 8.7      | 23       |
| Ergosinine     | 100          | 12       | 35       |
| Ergocornine    | 105          | 13       | 12       |
| Ergocorninine  | 112          | 6.1      | 10       |
| Ergocryptine   | 116          | 6.2      | 7.0      |
| Ergocryptinine | 103          | 5.8      | 13       |
| Ergotamine     | 118          | 8.1      | 13       |
| Ergotaminine   | 107          | 6.6      | 8.0      |
| Ergocristine   | 109          | 17       | 14       |
| Ergocristinine | 112          | 15       | 12       |

## References

1. Evans, J.D. *Straightforward Statistics for the Behavioral Sciences*; Brooks/Cole Publishing: Pacific Grove, CA, USA, 1996.
2. Topi, D.; Strajn, B.J.; Vrtač, K.P.; Kalcher, G.T. Occurrence of ergot alkaloids in wheat from Albania. *Food Addit. Contam. Part A* **2017**, *34*, 1333–1343.
